# Supplementary material
Source: PubMed Central journal article supplement (PMC3805079)

**Supplementary Table 1.** Demographic data and laboratory results of asymptomatic hemodialysis patients with preserved left ventricular ejection fraction

|                                         | cTnT >0.03 ng/ml<br>(n=42) | cTnT ≤0.03 ng/ml<br>(n=46) | <i>p</i> value |
|-----------------------------------------|----------------------------|----------------------------|----------------|
| Age (years)                             | 68.2 ± 10.7                | 65.4 ± 11.7                | 0.24           |
| Male, n (%)                             | 17 (39.5%)                 | 15 (31.9%)                 | 0.44           |
| BMI (kg/m <sup>2</sup> )                | 22.1 ± 2.7                 | 21.3 ± 3.0                 | 0.27           |
| SBP (mmHg)                              | 144.8 ± 16.1               | 148.2 ± 14.6               | 0.32           |
| DBP (mmHg)                              | 77.1 ± 9.9                 | 77.0 ± 8.8                 | 0.97           |
| Hemodialysis duration (years)           | 6.0 ± 5.8                  | 6.5 ± 4.6                  | 0.68           |
| Kt/V                                    | 1.65 ± 0.21                | 1.76 ± 0.24                | 0.10           |
| IDWG (kgw)                              | 2.84 ± 1.13                | 2.72 ± 0.95                | 0.77           |
| IDWG (%)                                | 5.1 ± 2.0                  | 5.2 ± 1.7                  | 0.61           |
| <b>Co-morbidities, number (%)</b>       |                            |                            |                |
| CAD                                     | 18 (42.9%)                 | 13 (28.3%)                 | 0.15           |
| Heart failure under control             | 7 (16.7%)                  | 3 (6.5%)                   | 0.18           |
| Diabetes mellitus                       | 28 (66.7%)                 | 17 (37.0%)                 | 0.005          |
| Hypertension                            | 37 (88.1%)                 | 40 (87.0%)                 | 0.87           |
| LV hypertrophy                          | 33 (78.6%)                 | 35 (76.1%)                 | 1.00           |
| <b>Cardiovascular drugs, number (%)</b> |                            |                            |                |
| CCB                                     | 26 (61.9%)                 | 25 (54.3%)                 | 0.47           |
| β-Blocker                               | 20 (47.6%)                 | 22 (47.8%)                 | 0.99           |

|                                   |              |               |      |
|-----------------------------------|--------------|---------------|------|
| ACE inhibitors / A-II antagonists | 20 (47.6%)   | 28 (60.9%)    | 0.21 |
| Statin                            | 7 (16.7%)    | 8 (17.3%)     | 0.93 |
| <b>Serum biochemistry study</b>   |              |               |      |
| Calcium (mg/dL)                   | 9.2 ± 0.7    | 9.3 ± 0.8     | 0.39 |
| Phosphate (mg/dL)                 | 4.3 ± 1.2    | 4.6 ± 1.4     | 0.43 |
| Albumin (g/dL)                    | 3.3 ± 0.4    | 3.4 ± 0.4     | 0.14 |
| Cholesterol (mg/dL)               | 163.4 ± 40.0 | 162.8 ± 35.5  | 0.95 |
| hs-CRP (mg/dL)                    | 1.45 ± 2.04  | 0.57 ± 0.60   | 0.01 |
| IL-6 (pg/mL)                      | 12.8 ± 9.2   | 12.3 ± 8.8    | 0.81 |
| PAI-1 (ng/ml)                     | 158.3 ± 76.6 | 223.8 ± 195.0 | 0.06 |

---

Abbreviations: ACE, angiotensin-converting enzymes; A-II, angiotensin II; BMI, body mass index; CAD, coronary artery disease; CCB, calcium channel blocker; cTnT, cardiac troponin T; DBP, diastolic blood pressure; ESRD, end-stage renal disease; hs-CRP, high sensitivity C-reactive protein; IDWG, inter-dialytic weight gain; IL, interleukin; LV, left ventricular; PAI-1, plasminogen-activator inhibitor type 1; SBP, systolic blood pressure.

Data are expressed as mean ± SD or number (%).

**Supplementary Table 2.** Echocardiography results of asymptomatic hemodialysis

patients with preserved left ventricular ejection fraction

|                                              | cTnT >0.03 ng/ml<br>(n=42) | cTnT ≤0.03 ng/ml<br>(n=46) | <i>p</i> value |
|----------------------------------------------|----------------------------|----------------------------|----------------|
| LV EDVi (ml/m <sup>2</sup> )                 | 69.3 ± 18.3                | 70.8 ± 20.3                | 0.76           |
| LV mass index (gm/m <sup>2</sup> )           | 160.4 ± 67.6               | 137.3 ± 27.2               | 0.06           |
| IVCe diameter (cm)                           | 1.3 ± 0.3                  | 1.2 ± 0.2                  | 0.09           |
| LV systolic function parameters              |                            |                            |                |
| LV EF (%)                                    | 63.0 ± 6.5                 | 65.7 ± 5.1                 | 0.07           |
| Systolic myocardial velocity,<br>s' (cm/sec) | 8.2 ± 2.2                  | 8.7 ± 1.7                  | 0.23           |
| GLS (%)                                      | -16.4 ± 4.1                | -19.6 ± 3.3                | <0.001         |
| Longitudinal SRs (sec <sup>-1</sup> )        | -0.91 ± 0.21               | -1.02 ± 0.22               | 0.03           |
| CS (%)                                       | -20.0 ± 6.0                | -21.7 ± 6.0                | 0.24           |
| Circumferential SRs (sec <sup>-1</sup> )     | -1.89 ± 0.65               | -1.95 ± 0.54               | 0.63           |
| LV diastolic function parameters             |                            |                            |                |
| E (m/sec)                                    | 0.79 ± 0.31                | 0.81 ± 0.30                | 0.76           |
| A (m/sec)                                    | 1.03 ± 0.36                | 1.04 ± 0.29                | 0.87           |
| E/A                                          | 0.79 ± 0.33                | 0.83 ± 0.44                | 0.62           |
| e' (cm/sec)                                  | 4.8 ± 1.3                  | 4.9 ± 1.4                  | 0.54           |
| E/e'                                         | 16.7 ± 6.4                 | 17.1 ± 8.5                 | 0.80           |
| LAVi (ml/m <sup>2</sup> )                    | 35.5 ± 8.6                 | 35.0 ± 7.8                 | 0.83           |

Abbreviations: CS, systolic circumferential strain; cTnT, cardiac troponin T; EDVi,

end-diastolic volume index; EF, ejection fraction; E/e', early trans-mitral  
velocity to tissue Doppler mitral annular early diastolic velocity ratio; GLS,  
global left ventricular peak systolic longitudinal strain; IVCe, end-expiratory  
inferior vena cava diameter; LAVi, left atrial volume index; LV, left  
ventricular; SRs, systolic strain rate

Data are expressed as mean  $\pm$  SD

**Supplementary figure 1.** Comparisons of left ventricular global peak systolic longitudinal strain (GLS) and global longitudinal strain rate (LSRs) in end-stage renal disease patients with either high cardiac troponin T (cTnT >0.03 ng/ml) or low cTnT ( $\leq 0.03$  ng/ml) serum concentrations.

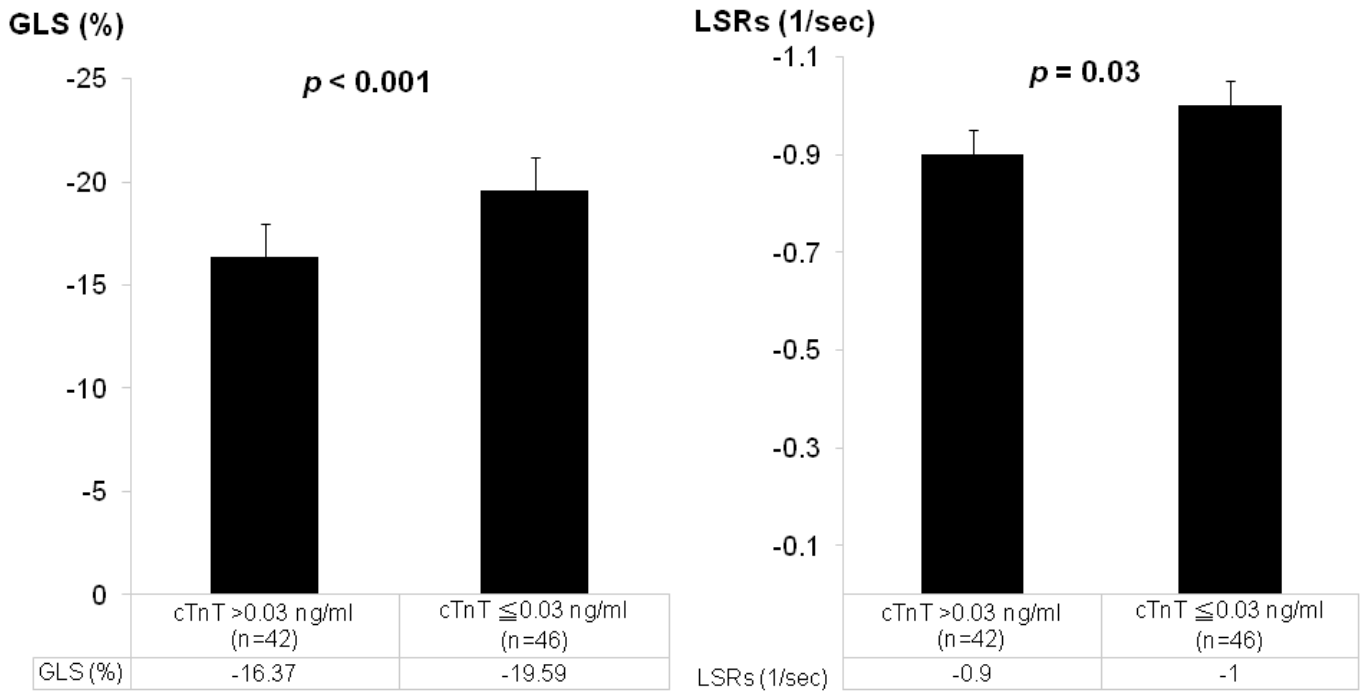

Supplement: CJN.10671012_CJN10671012SupplementaryData.pdf [file CJN.10671012_CJN10671012SupplementaryData.pdf]
